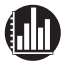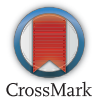

# Renal Effects of DPP-4 Inhibitor Sitagliptin or GLP-1 Receptor Agonist Liraglutide in Overweight Patients With Type 2 Diabetes: A 12-Week, Randomized, Double-Blind, Placebo-Controlled Trial

*Diabetes Care* 2016;39:2042–2050 | DOI: 10.2337/dc16-1371

Lennart Tonneijck,<sup>1</sup> Mark M. Smits,<sup>1</sup>  
Marcel H.A. Muskiet,<sup>1</sup> Trynke Hoekstra,<sup>2,3</sup>  
Mark H.H. Kramer,<sup>1</sup> A.H. Jan Danser,<sup>4</sup>  
Piet M. ter Wee,<sup>5</sup> Michaela Diamant,<sup>1†</sup>  
Jaap A. Joles,<sup>6</sup> and Daniël H. van Raalte<sup>1</sup>

## OBJECTIVE

To investigate effects of dipeptidyl peptidase-4 inhibitor (DPP-4i) sitagliptin or glucagon-like peptide 1 (GLP-1) receptor agonist liraglutide treatment on renal hemodynamics, tubular functions, and markers of renal damage in overweight patients with type 2 diabetes without chronic kidney disease (CKD).

## RESEARCH DESIGN AND METHODS

In this 12-week, randomized, double-blind trial, 55 insulin-naïve patients with type 2 diabetes (mean  $\pm$  SEM: age  $63 \pm 7$  years, BMI  $31.8 \pm 4.1$  kg/m<sup>2</sup>, glomerular filtration rate [GFR]  $83 \pm 16$  mL/min/1.73 m<sup>2</sup>; median [interquartile range]: albumin-to-creatinine ratio (ACR) 1.09 mg/mmol [0.47–3.31]) received sitagliptin (100 mg/day), liraglutide (1.8 mg/day), or matching placebos. GFR (primary end point) and effective renal plasma flow (ERPF) were determined by inulin and para-aminohippuric acid clearance, respectively. Intrarenal hemodynamic variables were estimated. Absolute and fractional excretions of sodium (FE<sub>Na</sub>), potassium, and urea (FE<sub>U</sub>) and renal damage markers (ACR, neutrophil gelatinase-associated lipocalin [NGAL], and kidney injury molecule-1 [KIM-1]) were measured. Plasma renin concentration (PRC) and glycated hemoglobin (HbA<sub>1c</sub>) were assessed. At weeks 2 and 6, estimated GFR and fractional electrolyte excretions were determined.

## RESULTS

At week 12, GFR was not affected by sitagliptin ( $-6$  mL/min/1.73 m<sup>2</sup> [95% CI  $-14$  to  $3$ ],  $P = 0.17$ ) or liraglutide ( $+3$  mL/min/1.73 m<sup>2</sup> [ $-5$  to  $11$ ],  $P = 0.46$ ), compared with placebo. Sitagliptin modestly reduced estimated glomerular hydraulic pressure (P<sub>GLO</sub>;  $P = 0.043$ ). ERPF, other intrarenal hemodynamic variables, renal damage markers, and PRC did not change for both treatments. Both agents reduced HbA<sub>1c</sub>. Only at week 2, sitagliptin increased FE<sub>Na</sub> and FE<sub>U</sub> ( $P = 0.005$ ).

## CONCLUSIONS

Twelve-week treatment with sitagliptin or liraglutide does not affect measured renal hemodynamics. No sustained changes in tubular functions or alteration in renal damage markers were observed. The validity and clinical relevance of the slight sitagliptin-induced P<sub>GLO</sub> reduction remains speculative.

<sup>1</sup>Diabetes Center, Department of Internal Medicine, VU University Medical Center, Amsterdam, the Netherlands

<sup>2</sup>Department of Health Sciences and the EMGO Institute for Health and Care Research, VU University Amsterdam, Amsterdam, the Netherlands

<sup>3</sup>Department of Epidemiology and Biostatistics, VU University Medical Center, Amsterdam, the Netherlands

<sup>4</sup>Division of Pharmacology and Vascular Medicine, Department of Internal Medicine, Erasmus University Medical Center, Rotterdam, the Netherlands

<sup>5</sup>Department of Nephrology, VU University Medical Center, Amsterdam, the Netherlands

<sup>6</sup>Department of Nephrology and Hypertension, University Medical Center, Utrecht, the Netherlands

Corresponding author: Lennart Tonneijck, l.tonneijck@vumc.nl.

Received 27 June 2016 and accepted 10 August 2016.

Clinical trial reg. no. NCT01744236, clinicaltrials.gov.

This article contains Supplementary Data online at <http://care.diabetesjournals.org/lookup/suppl/doi:10.2337/dc16-1371/-/DC1>.

†Deceased. In memory of Michaela Diamant, whose experience and expertise were crucial for the design of this study.

© 2016 by the American Diabetes Association. Readers may use this article as long as the work is properly cited, the use is educational and not for profit, and the work is not altered. More information is available at <http://www.diabetesjournals.org/content/license>.

Driven by the relentless global obesity and diabetes pandemic, diabetic kidney disease (DKD) has become the leading cause of chronic kidney disease (CKD), resulting in end-stage kidney disease, cardiovascular events, and premature death (1). Prevention and treatment of DKD in type 2 diabetes focuses on early detection of albuminuria and decline of glomerular filtration rate (GFR) and control of renal risk factors, including hyperglycemia, obesity, systemic hypertension, glomerular hyperfiltration, albuminuria, and dyslipidemia (1). As renin-angiotensin system (RAS) inhibitors exhibit blood pressure-independent benefits on renal outcome, these drugs are widely recommended for hypertension management in type 2 diabetes (1). However, despite intensified control of multiple risk factors, 25% of the patients with type 2 diabetes in the Steno-2 trial developed or progressed in their renal disease, and the rate of GFR decline was similar to conventional therapy (2). Interestingly, in Steno-2 and daily clinical practice (2,3), recommended targets are often not achieved, and as such, a single drug that targets various risk factors involved in the pathogenesis of DKD may lead to more salutary long-term renal outcomes.

Glucagon-like peptide 1 (GLP-1)-based therapies, i.e., dipeptidyl peptidase-4 inhibitors (DPP-4Is) and GLP-1 receptor agonists (GLP-1RAs), are widely used antihyperglycemic drugs in type 2 diabetes. Both drug classes improve pancreatic islet cell function by increasing insulin and reducing glucagon secretion but also display various extrapancreatic actions (1). Interestingly, in experimental models of diabetes and hypertension, GLP-1-based therapies prevented the onset and progression of renal disease as well as renal morphological abnormalities of DKD (4). In clinical trials, DPP-4Is (5–9) and GLP-1RAs (10–14) decrease the surrogate renal end point albuminuria in patients with type 2 diabetes, while the composite renal end point was reduced by 22% in the cardiovascular outcome trial of the GLP-1RA liraglutide (15). The finding that the albuminuria-lowering effect of the DPP-4I linagliptin is independent of changes in glycated hemoglobin ( $HbA_{1c}$ ) suggests that mechanisms beyond glucose lowering are involved (16).

The glucose-independent renoprotective potential of GLP-1-based therapies

in type 2 diabetes may be explained by their actions on several renal risk factors (1). As such, in patients with type 2 diabetes, DPP-4Is and GLP-1RAs decrease blood pressure (1) and improve lipid profiles, whereas GLP-1RA treatment reduces body weight (1). GLP-1 peptide infusion in obese hyperfiltrating males (25% of whom were diagnosed with type 2 diabetes) resulted in a reduction of creatinine clearance—measured glomerular hyperfiltration (17), which is closely associated with glomerular hydraulic pressure ( $P_{GLO}$ ) (1). Moreover, the reduction in albuminuria at 7 weeks (18) and 1 year (13) of liraglutide treatment was paralleled by a decrease in GFR in an uncontrolled open-label study in patients with type 2 diabetes. However, other acute studies using GLP-1 or GLP-1RA in healthy males and patients with type 2 diabetes did not observe favorable responses on renal hemodynamics (19–24). Thus, the effects of DPP-4I or GLP-1RA treatment on renal hemodynamics remain incompletely understood.

In the current study, we determined the effects of prolonged (12-week) treatment with the DPP-4I sitagliptin or GLP-1RA liraglutide on GFR, effective renal plasma flow (ERPF), tubular functions, markers of renal damage, and renal risk factors in patients with type 2 diabetes without CKD. We hypothesized that GLP-1-based therapies reduce gold standard—measured GFR and estimated  $P_{GLO}$  in type 2 diabetes.

## RESEARCH DESIGN AND METHODS

### Trial Design

This was a phase 4, monocenter, randomized, double-blind, placebo-controlled, double-dummy, parallel-group, mechanistic intervention trial, as described previously (25). The study was approved by the ethics review board of the VU University Medical Center and local authorities. The study was registered at ClinicalTrials.gov (NCT01744236) and complied with the Declaration of Helsinki and Good Clinical Practice guidelines.

### Study Population

Patients were recruited by advertisements in local newspapers. The inclusion and exclusion criteria were previously reported (25). In short, eligible patients (aged 35–75 years) were Caucasian, were men or postmenopausal women with type 2 diabetes ( $HbA_{1c}$  6.5–9.0% [48–75 mmol/mol]), had a BMI of 25–40 kg/m<sup>2</sup>, and were

treated with a stable dose of metformin and/or sulfonylurea for  $\geq 3$  months before enrollment. Key exclusion criteria included history of malignancy, pancreatic or active liver disease, estimated GFR (eGFR)  $< 60$  mL/min/1.73 m<sup>2</sup>, current urinary tract infection, active nephritis, urinary retention (completeness of bladder emptying was assessed by bladder ultrasonography at screening visit), or use of diuretics that could not be stopped 3 months prior to and during the intervention period. All patients provided written informed consent before trial-related activities.

### Intervention and Randomization

Patients were randomized 1:1:1, with a block size of six, by an independent trial pharmacist using computer-generated numbers (25). Patients and investigators remained blinded to treatment status until the last patient completed the last study visit and database lock. Patients received prefilled pens for subcutaneous injection containing visually identical liraglutide or placebo (Novo Nordisk A/S, Bagsværd, Denmark), in addition to visually identical encapsulated oral capsules (ACE Pharmaceutical, Zeevolde, the Netherlands) containing sitagliptin (Merck, Kenilworth, NJ) or placebo, both to be taken once daily in the evening. A dose increment schedule was used for the subcutaneous injections (week 1, 0.6 mg; week 2, 1.2 mg; weeks 3–12, 1.8 mg daily), and depending on drug tolerance, time between dose increments could be extended or the dose could be decreased at the investigator's discretion.

### Study End Points

The primary end point was treatment-induced change in inulin clearance—measured GFR from baseline to week 12, compared with placebo (25). All other (intra)renal hemodynamic variables, tubular functions (i.e., tubular handling of sodium, potassium, urea, or hydrogen, urinary osmolality), and markers of renal damage were considered secondary or exploratory end points. Changes in eGFR, blood pressure, body weight, body water percentage,  $HbA_{1c}$ , blood and urinary glucose, insulin, lipid profiles, and plasma renin concentration (PRC) were also analyzed. All variables were measured at baseline and after 12 weeks of treatment. Additional measurements of

eGFR, blood pressure, and fractional electrolyte excretion were performed after 2 and 6 weeks of treatment.

### Study Protocol

Patients were instructed to adhere to an average intake of sodium chloride (9–12 g/day) and protein (1.5–2.0 g/kg/day) 2 days prior to renal testing days, to abstain from vigorous physical activity and alcohol ingestion for  $\geq 24$  h, and not to use nicotine or caffeine for  $\geq 12$  h. After an overnight fast, patients consumed 500 mL of tap water before arriving at the clinical research unit at 07:30 A.M. With the exception of metformin and thyroid hormone replacement therapy, all morning medications were delayed. Participants assumed a semirecumbent position in a temperature-controlled room ( $23.0 \pm 1.0^\circ\text{C}$ ), and a venous cannula was inserted into an antecubital vein of the dominant arm for infusion of the renal tracer substances and into an antecubital vein of the nondominant arm for venous blood sampling. Before the renal tests, urine was collected to measure sodium, potassium, urea, creatinine, albumin, neutrophil gelatinase-associated lipocalin (NGAL) and kidney injury molecule-1 (KIM-1) (Supplementary Fig. 1). In addition, morning blood samples were taken to determine  $\text{HbA}_{1c}$ , plasma glucose, serum insulin, lipids (triglycerides, total cholesterol, HDL cholesterol [HDL-C], LDL cholesterol [LDL-C]), albumin, PRC, creatinine, and cystatin C. Subsequently, the renal tests commenced. A bolus of inulin (Inutest; Fresenius Kabi Austria GmbH, Graz, Austria) 45 mg/kg body weight and PAH (initially aminohippurate sodium “PAH” 20%; Merck, Whitehouse Station, NJ; but due to discontinued manufacturing of this product, we switched to 4-aminohippuric acid solution 20%; Bachem Distribution Services GmbH, Weil am Rhein, Germany) 6 mg/kg was infused over 10 min. For continuous infusion, inulin was administered at 22.5 mg/mg (target plasma concentration 250 mg/L) and PAH at 12.7 mg/min (target plasma concentration 20 mg/L). After 90 min of equilibration, urine was collected by spontaneous voiding every 45 min for two periods. Diuresis was induced by oral intake of 10 mL/kg (maximum 1,000 mL) tap water during equilibration, followed by an intake of 200 mL/h.

Patients were permitted to be upright during voiding and encouraged to reach a subjective feeling of total bladder emptying. Blood samples were taken before and after each urine collection period. Sodium, potassium, urea, osmolality, pH, and glucose were measured in the second urine collection, and blood samples were analyzed for sodium, potassium, and urea before and after this collection period. Hematocrit was determined between two urine collection periods. Intravenous lines were flushed with 2 mL of 0.9% saline after blood sampling, and a 0.9% saline infusion rate of 10 mL/h was sustained throughout the testing day, corresponding to a total volume load of 38 mL and a sodium load of  $\sim 0.3$  g during the renal tests. Body water percentage was assessed before the renal tests and in between the two urine collection periods, using a single-frequency bioelectrical impedance analyzer (Maltron BF-906; Maltron International Ltd., Essex, U.K.). Systolic blood pressure (SBP), diastolic blood pressure (DBP), mean arterial pressure (MAP), and heart rate were measured at arrival at the clinical research unit and during the renal tests by an automated oscillometric device (Dinamap; GE Healthcare, Little Chalfont, U.K.) over the brachial artery of the nondominant arm. Measurements were performed in triplicate at 1–2-min intervals, and the mean of the last two measurements was used. After 2 and 6 weeks of treatment, patients arrived in the fasting state and delayed all morning medication, except for metformin. Blood pressure was measured at arrival at the clinical research unit. Blood, obtained by venipuncture, and urine was measured for sodium, potassium, urea, and creatinine at week 2, and cystatin C was only measured in blood. Creatinine was determined in blood at week 6.

### Assays

All urine and blood samples obtained at baseline and after 12 weeks of treatment were analyzed for inulin and PAH, as previously described (24). Venous blood glucose was measured in all blood samples during the renal tests using a YSI-2300 STAT glucose analyzer (YSI Life Sciences, Yellow Springs, OH). Sodium, potassium, urea, osmolality, creatinine,  $\text{HbA}_{1c}$ , plasma glucose, and lipids were assayed at the Department of Clinical Chemistry at the VU University

Medical Center by conventional methods (24). Insulin was measured using an immunoassay (ADVIA Centaur-XP Immunoassay System; Siemens Healthcare, Erlangen, Germany). Urinary pH was determined by a hand-held VARIO 2V00 pH meter and SenTix-V electrode (Wissenschaftlich-Technische Werkstätten GmbH, Weilheim, Germany). Urine concentrations of NGAL and KIM-1 were determined by sandwich ELISA according to the manufacturer's specification (R&D Systems, Minneapolis, MN). PRC was determined with a commercial immunoradiometric kit (Renin III; Cisbio, Gif-sur-Yvette, France). Insulin resistance was estimated from fasting plasma glucose (FPG) and insulin, using the updated homeostatic model assessment-insulin resistance (HOMA2-IR) (<https://www.dtu.ac.uk/homacalculator>).

### Sample Size Calculation

Based on previous human data (17), we calculated that a sample size of 15 patients per treatment arm should be sufficient to detect a change in GFR of at least 15%, assuming an SD of 8 mL/min,  $\alpha = 0.05$ , and power ( $1 - \beta$ ) of 80%. To allow for a dropout rate of 15% and increased power, we decided to include 20 patients per treatment arm (25).

### Calculation of Renal Physiology and Markers of Kidney Damage

GFR and ERPF were calculated from inulin and PAH clearances, respectively, based on timed urine sampling, and the average of the two consecutive urine collection periods was used for analysis. Renal blood flow (RBF) was calculated as  $\text{ERPF}/(1 - \text{hematocrit})$ , filtration fraction (FF) as  $\text{GFR}/\text{ERPF}$ , and renal vascular resistance as  $\text{MAP}/\text{RBF}$ . Intrarenal hemodynamics (i.e.,  $P_{\text{GLO}}$  and afferent and efferent arteriolar resistance [ $R_A$  and  $R_E$ , respectively]) were estimated according to the Gomez formulae (Supplementary Methods) (24). For eGFR, we used both the Chronic Kidney Disease Epidemiology Collaboration (CKD-EPI) 2009 and creatinine-cystatin C CKD-EPI 2012 equations (accessed via [www.kidney.org/professionals/kdoqi/gfr\\_calculator](http://www.kidney.org/professionals/kdoqi/gfr_calculator)). Fractional sodium ( $\text{FE}_{\text{Na}}$ ), potassium ( $\text{FE}_{\text{K}}$ ), and urea ( $\text{FE}_{\text{U}}$ ) excretion were calculated by using inulin as reference substance, unless stated otherwise. Absolute electrolyte excretion was calculated as urinary electrolyte

concentrations  $\times$  urine flow. We calculated plasma osmolality as  $2[\text{Na}] + [\text{urea}] + [\text{glucose}]$ , and osmol clearance by urine osmolality  $\times$  urine flow/plasma osmolality. Urine flow — osmol clearance was used to calculate free water clearance. Urinary albumin, NGAL, and KIM-1 were corrected for creatinine, and renal hemodynamic variables were corrected for body surface area using the Mosteller formula (24).

### Data Management and Statistics

Data were double entered into an electronic data management system (OpenClinica LLC, version 3.3, Waltham, MA) and exported to the final study database. Before deblinding, urine collection periods characterized by profound collection errors, defined as an inulin extraction ratio of greater or less than one SD of the mean, were discarded from the analyses. Urine collection errors were present in eight patients (two randomized to placebo, four to sitagliptin, and two to liraglutide), in whom we calculated GFR and ERPF according to the continuous infusion method (26) and excluded urine flow-dependent end points. Statistical analyses were performed in the per protocol population using SPSS 22.0 (IBM SPSS Inc.,

Chicago, IL). Multivariable linear regression models were used for single measured end points and linear mixed models for repeated measured end points. In the multivariable regression model, the end point of interest was added as dependent variable, and treatment with sitagliptin or liraglutide were included as dummy variables (comparing sitagliptin vs. placebo and liraglutide vs. placebo). Corresponding baseline values were added as independent variable to correct for potential between-group differences at baseline. In the linear mixed model, treatments with sitagliptin or liraglutide were included as dummy variables, time as fixed factor, and intervention-by-time interaction was the parameter of interest. Data are presented as mean  $\pm$  SEM or median with a two-sided 95% CI, unless stated otherwise. Between-group differences were tested at a two-sided  $\alpha$ -level of 0.05.

### RESULTS

Of the 94 patients screened between July 2013 and March 2015, 60 patients were included, of whom 56 were randomly assigned to treatments with placebo ( $n = 17$ ), sitagliptin ( $n = 20$ ), or liraglutide ( $n = 19$ ) (Supplementary Fig. 2).

Treatment discontinuation occurred in one patient in the sitagliptin group because of adverse events (dizziness and pollakiuria). Due to intolerance of a higher-dose liraglutide, one patient completed the study using liraglutide 0.6 mg daily. Baseline characteristics were similar among the three treatment groups (Table 1).

### Primary End Point

Neither sitagliptin ( $-6 \text{ mL/min/1.73 m}^2$  [95% CI  $-14$  to  $3$ ],  $P = 0.169$ ) nor liraglutide ( $+3 \text{ mL/min/1.73 m}^2$  [ $-5$  to  $11$ ],  $P = 0.464$ ) affected GFR compared with placebo (Fig. 1A).

### Secondary Renal End Points

ERPF tended to decrease after 12 weeks of treatment with sitagliptin ( $-37$  [ $-74$  to  $0.6$ ],  $P = 0.053$ ) but did not change with liraglutide ( $P = 0.854$ ) (Table 2). Only sitagliptin reduced  $P_{\text{GLO}}$  by 2.8 mmHg ( $-5.5$  to  $-0.1$ ,  $P = 0.043$ ) and  $\text{FE}_{\text{U}}$  ( $P = 0.017$ ). No changes in other (intra)renal hemodynamic variables or tubular functions were observed (Table 2). Neither treatment induced changes in albumin-to-creatinine ratio (ACR), NGAL, or KIM-1 (Table 2). Although eGFR was reduced after 2 weeks in all study groups, no changes of sitagliptin

**Table 1—Baseline characteristics**

| Variables                                        | Placebo ( $n = 17$ ) | Sitagliptin ( $n = 19$ ) | Liraglutide ( $n = 19$ ) | All ( $n = 55$ ) |
|--------------------------------------------------|----------------------|--------------------------|--------------------------|------------------|
| Age (years)                                      | 65.8 $\pm$ 5.8       | 61.7 $\pm$ 6.8           | 60.5 $\pm$ 7.2           | 62.6 $\pm$ 6.9   |
| Male, $n$ (%)                                    | 13 (77)              | 16 (84)                  | 14 (74)                  | 43 (78)          |
| Current smoker, $n$ (%)                          | 2 (12)               | 5 (26)                   | 3 (16)                   | 10 (18)          |
| Weight (kg)                                      | 95.8 $\pm$ 9.8       | 99.4 $\pm$ 17.6          | 106.0 $\pm$ 17.2         | 100.6 $\pm$ 15.8 |
| BMI ( $\text{kg/m}^2$ )                          | 30.8 (28.9–31.5)     | 30.4 (28.2–35.9)         | 32.0 (30.9–35.9)         | 31.0 (28.3–33.6) |
| Diabetes duration (years)                        | 8 (5–12)             | 6 (4–12)                 | 7 (4–13)                 | 6 (4–12)         |
| HbA <sub>1c</sub> (%)                            | 7.5 $\pm$ 0.7        | 7.1 $\pm$ 0.5            | 7.4 $\pm$ 0.7            | 7.3 $\pm$ 0.6    |
| HbA <sub>1c</sub> (mmol/mol)                     | 58 $\pm$ 8           | 54 $\pm$ 6               | 57 $\pm$ 7               | 56 $\pm$ 7       |
| FPG (mmol/L)                                     | 8.9 $\pm$ 2.0        | 8.0 $\pm$ 0.9            | 8.3 $\pm$ 1.4            | 8.4 $\pm$ 1.5    |
| HOMA2-IR                                         | 1.6 (1.3–2.7)        | 1.7 (1.2–2.8)            | 1.6 (1.0–2.4)            | 1.7 (1.2–2.4)    |
| GFR ( $\text{mL/min/1.73 m}^2$ )                 | 83 $\pm$ 19          | 87 $\pm$ 15              | 79 $\pm$ 14              | 83 $\pm$ 16      |
| eGFR (CKD-EPI 2009) ( $\text{mL/min/1.73 m}^2$ ) | 86 $\pm$ 13          | 90 $\pm$ 12              | 90 $\pm$ 11              | 89 $\pm$ 12      |
| eGFR (CKD-EPI 2012) ( $\text{mL/min/1.73 m}^2$ ) | 90 $\pm$ 15          | 92 $\pm$ 13              | 93 $\pm$ 12              | 92 $\pm$ 13      |
| ACR (mg/mmol)*                                   | 1.13 (0.45–4.89)     | 1.10 (0.48–4.10)         | 1.00 (0.52–1.33)         | 1.09 (0.47–3.31) |
| SBP (mmHg)                                       | 137.6 $\pm$ 14.9     | 132.5 $\pm$ 12.4         | 136.6 $\pm$ 17.0         | 135.5 $\pm$ 14.8 |
| DBP (mmHg)                                       | 76.4 $\pm$ 6.8       | 75.2 $\pm$ 7.4           | 77.0 $\pm$ 5.4           | 76.2 $\pm$ 6.5   |
| MAP (mmHg)                                       | 99.1 $\pm$ 10.3      | 95.9 $\pm$ 9.1           | 97.1 $\pm$ 9.3           | 97.3 $\pm$ 9.5   |
| Heart rate (bpm)                                 | 65 $\pm$ 9           | 63 $\pm$ 8               | 67 $\pm$ 9               | 65 $\pm$ 9       |
| Metformin use, $n$ (%)                           | 15 (88)              | 18 (95)                  | 19 (100)                 | 52 (95)          |
| Sulfonylurea use, $n$ (%)                        | 8 (47)               | 9 (47)                   | 7 (37)                   | 24 (44)          |
| Antihypertensive medication use, $n$ (%)         | 11 (65)              | 10 (53)                  | 15 (79)                  | 36 (66)          |
| RAS inhibitor use, $n$ (%)                       | 11 (65)              | 9 (47)                   | 15 (79)                  | 35 (64)          |

Data are mean  $\pm$  SD or median (interquartile range), unless stated otherwise. \*Most patients had ACR  $<3 \text{ mg/mmol}$ . In 14 patients, ACR was  $\geq 3 \text{ mg/mmol}$  (6 randomized to placebo, 6 to sitagliptin, and 2 to liraglutide).

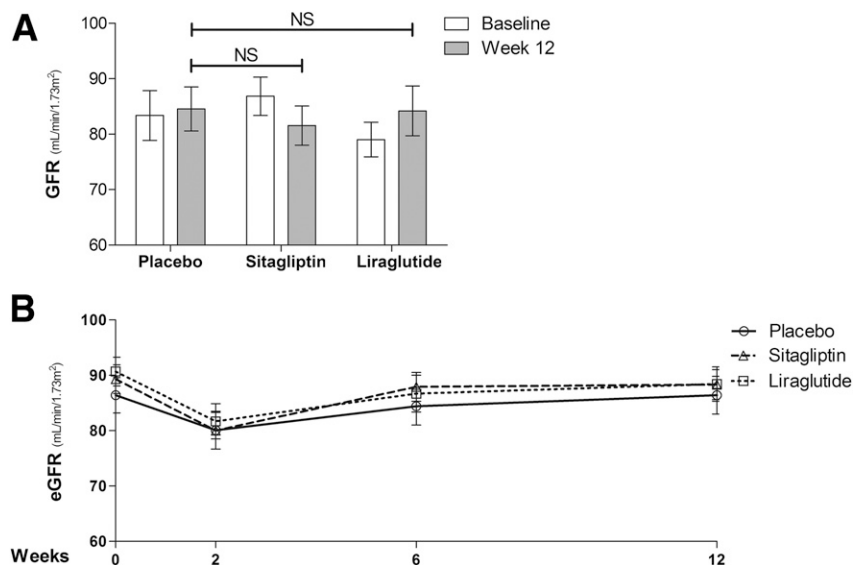

**Figure 1**—A: Mean  $\pm$  SEM GFR at baseline and week 12. B: Mean  $\pm$  SEM eGFR at weeks 0, 2, 6, and 12 using the CKD-EPI 2009 equation.

or liraglutide were observed at weeks 2 and 6 compared with placebo (Fig. 1B and Supplementary Fig. 3). Increases in creatinine-based  $FE_{Na}$  ( $P = 0.005$ ) and  $FE_{U}$  ( $P = 0.025$ ) were seen with sitagliptin at week 2 (Fig. 2) and returned to baseline after 12 weeks of study.

#### Blood Pressure, Body Weight, and Body Water

During the renal tests after 12 weeks of treatment, sitagliptin reduced SBP by 9 mmHg (95% CI  $-17$  to  $-1$ ,  $P = 0.026$ ), and liraglutide reduced SBP by 8 mmHg ( $-17$  to  $0.03$ ,  $P = 0.051$ ), compared with placebo (Table 2). When blood pressure measurements at arrival at the clinical research unit were used, including values at weeks 2 and 6, only liraglutide reduced SBP by 13 mmHg ( $-22$  to  $-3$ ,  $P = 0.008$ ) (Supplementary Fig. 4A–C). Moreover, sitagliptin tended to reduce body weight after 12 weeks (1.2 kg [ $-2.5$  to  $0.05$ ],  $P = 0.059$ ), whereas liraglutide reduced body weight after 6 weeks (1.7 kg [ $-3.0$  to  $-0.5$ ],  $P = 0.009$ ) and 12 weeks (1.9 kg [ $-3.2$  to  $-0.6$ ],  $P = 0.005$ ) (Supplementary Fig. 5). The treatments did not change body water percentage ( $P > 0.05$ ) (Supplementary Table 1).

#### Glycemia, Insulin, Lipids, Plasma Albumin, and PRC

At week 12, mean reductions in  $HbA_{1c}$  from baseline, compared with placebo, were 0.8% ( $-9$  mmol/mol) ( $-1.2$  to  $-0.4$  [ $-13$  to  $-4$ ],  $P = 0.001$ ) for sitagliptin and

1.3% ( $-14$  mmol/mol) ( $-1.7$  to  $-0.9$  [ $-19$  to  $-9$ ],  $P < 0.001$ ) for liraglutide. FPG was reduced by both treatments ( $P < 0.001$ ), whereas time-averaged mean blood glucose tended to decrease with sitagliptin (0.7 mmol/L [ $-1.4$  to  $0.05$ ],  $P = 0.067$ ) and decreased with liraglutide (1.3 mmol/L [ $-2.0$  to  $-0.6$ ],  $P < 0.001$ ) during the renal tests (Supplementary Table 1). Baseline urinary glucose was  $<0.11$  mmol/L in all but one patient (0.97 mmol/L) and did not change in response to treatment (data not shown). Fasting insulin increased with sitagliptin ( $P = 0.020$ ) and liraglutide ( $P < 0.001$ ). Liraglutide reduced HDL-C ( $P = 0.036$ ), but other aspects of the lipid spectrum did not change. Plasma albumin levels were reduced with sitagliptin ( $P = 0.020$ ) and liraglutide ( $P = 0.008$ ). PRC did not change with either sitagliptin or liraglutide (Supplementary Table 1).

#### Sensitivity Analyses

Corrections for between-group differences in SBP or MAP,  $HbA_{1c}$ , time-averaged mean blood glucose, and fasting insulin concentrations did not affect treatment-induced changes in GFR. Likewise, when GFR was not indexed for body surface area, treatment-induced effects on GFR were still not different (Supplementary Fig. 6).

#### Safety

Both treatments were generally well tolerated. Adverse events of gastrointestinal origin were reported by 2 (11%) patients in the sitagliptin group, 12 (63%) patients

in the liraglutide group, and 0 patients in the placebo group. Other adverse events (dermal, musculoskeletal, and nasopharyngeal) were rare, and occurrence was similar in all groups.

#### CONCLUSIONS

The current study is the first to investigate the effects of prolonged treatment with GLP-1–based therapies on gold standard–measured renal hemodynamics in patients with type 2 diabetes. Twelve-week treatment with sitagliptin or liraglutide does not affect GFR, ERPF, or other (intra)renal hemodynamic variables, although sitagliptin slightly reduced estimated  $P_{GLO}$ . In addition, sitagliptin increased creatinine-based  $FE_{Na}$  and  $FE_{U}$  at week 2, which was not sustained after 12 weeks of treatment. Finally, renal damage markers are not affected by either sitagliptin or liraglutide.

The neutral effect of GLP-1–based therapy on GFR is in accordance with several randomized clinical trials of 12–30 weeks duration, in which DPP-4I or GLP-1RA treatment did not change (the slope of) creatinine-eGFR in patients with type 2 diabetes with (27–30) and without (5,29,31) renal impairment. However, as creatinine-based GFR estimates are generally inaccurate in patients with type 2 diabetes (1), renal clearance tests using exogenous tracers are needed to measure renal function. Acute intervention studies that used such tracers in healthy male participants also did not observe changes in GFR after GLP-1 peptide infusion (19,22), although acute exenatide infusion increased GFR, ERPF, and estimated  $P_{GLO}$  in overweight healthy males (21). Moreover, in patients with type 2 diabetes without CKD, acute administration of GLP-1 peptide (20), exenatide (24), or liraglutide (23) did not affect GFR. However, in obese insulin-resistant men with baseline glomerular hyperfiltration, acute GLP-1 peptide infusion reduced creatinine clearance (17), whereas prolonged liraglutide treatment reduced measured GFR in patients with type 2 diabetes with albuminuria and normal GFR (13,18).

Several mechanisms by which GLP-1–based therapies may affect renal hemodynamics have been proposed (1,32). GLP-1 (and associated therapies) could blunt the diabetes-associated proximal

**Table 2—Comparison of renal and hemodynamic outcome measures between sitagliptin vs. placebo and liraglutide vs. placebo**

| Variables                                          | Placebo (n = 17)  |                   | Sitagliptin (n = 19) |                   | Mean difference<br>vs. placebo | Liraglutide (n = 19) |                  | Mean difference<br>vs. placebo |
|----------------------------------------------------|-------------------|-------------------|----------------------|-------------------|--------------------------------|----------------------|------------------|--------------------------------|
|                                                    | Baseline          | Week 12           | Baseline             | Week 12           |                                | Baseline             | Week 12          |                                |
| Renal hemodynamics                                 |                   |                   |                      |                   |                                |                      |                  |                                |
| ERPF (mL/min/1.73 m <sup>2</sup> )                 | 357 ± 25          | 373 ± 25          | 374 ± 19             | 349 ± 15          | −37 (−74 to 0.6)               | 339 ± 17             | 363 ± 20         | 3 (−34 to 41)                  |
| RBF (mL/min/1.73 m <sup>2</sup> )                  | 611 ± 48          | 641 ± 50          | 654 ± 33             | 612 ± 25          | −63 (−130 to 4)                | 576 ± 31             | 622 ± 38         | 10 (−58 to 77)                 |
| FF (%)                                             | 23.8 ± 0.6        | 23.2 ± 0.8        | 23.8 ± 0.9           | 23.6 ± 0.8        | 0.4 (−0.9 to 1.7)              | 23.7 ± 0.6           | 23.4 ± 0.7       | 0.3 (−1.0 to 1.6)              |
| RVR (mmHg/L/min)                                   | 0.184 ± 0.013     | 0.179 ± 0.013     | 0.165 ± 0.008        | 0.173 ± 0.008     | 0.007 (−0.016 to 0.030)        | 0.176 ± 0.012        | 0.177 ± 0.011    | −0.003 (−0.020 to 0.026)       |
| Estimated variables                                |                   |                   |                      |                   |                                |                      |                  |                                |
| P <sub>Geo</sub> (mmHg)                            | 61.0 ± 1.5        | 61.7 ± 1.3        | 61.4 ± 1.3           | 59.1 ± 1.3        | −2.8 (−5.5 to −0.1)*           | 59.7 ± 1.1           | 62.0 ± 1.5       | −0.4 (−3.1 to 2.3)             |
| R <sub>A</sub> (dyne · s · cm <sup>−5</sup> )      | 5,949 ± 677       | 6,001 ± 658       | 5,365 ± 424          | 5,839 ± 384       | 203 (−1,050 to 1,456)          | 5,638 ± 574          | 5,761 ± 615      | −238 (−1,503 to 1,026)         |
| R <sub>E</sub> (dyne · s · cm <sup>−5</sup> )      | 3,969 ± 159       | 3,840 ± 178       | 3,802 ± 158          | 3,755 ± 140       | 63 (−189 to 315)               | 3,927 ± 124          | 3,859 ± 150      | 57 (−194 to 308)               |
| Renal tubular functions                            |                   |                   |                      |                   |                                |                      |                  |                                |
| FE <sub>Na</sub> (%)                               | 1.30 (0.91–1.34)  | 1.34 (0.66–1.97)  | 1.11 (0.89–1.41)     | 0.97 (0.54–1.47)  | 0.78 (0.52–1.16)§              | 1.14 (0.95–1.41)     | 1.04 (0.62–1.37) | 0.75 (0.50–1.13)§              |
| FE <sub>K</sub> (%)                                | 20 ± 1            | 20 ± 2            | 21 ± 1               | 20 ± 2            | −2 (−7 to 3)                   | 22 ± 2               | 22 ± 2           | 1 (−4 to 6)                    |
| FE <sub>U</sub> (%)                                | 65 (62–71)        | 67 (59–78)        | 69 (66–70)           | 56 (41–65)        | 0.75 (0.59–0.95)§*             | 73 (68–77)           | 69 (50–83)       | 0.99 (0.77–1.27)§              |
| Na excretion (μmol/min/1.73 m <sup>2</sup> )       | 121 ± 11          | 142 ± 22          | 150 ± 15             | 141 ± 20          | −25 (−79 to 29)                | 137 ± 9              | 138 ± 18         | −17 (−69 to 35)                |
| K excretion (μmol/min/1.73 m <sup>2</sup> )        | 57 ± 5            | 67 ± 6            | 72 ± 5               | 71 ± 7            | −2 (−25 to 21)                 | 67 ± 7               | 79 ± 10          | 8 (−14 to 30)                  |
| Urea excretion (μmol/min/1.73 m <sup>2</sup> )     | 221 ± 13          | 208 ± 14          | 256 ± 21             | 191 ± 20          | −31 (−86 to 24)                | 258 ± 29             | 260 ± 26         | 38 (−18 to 93)                 |
| Urinary pH                                         | 5.64 ± 0.14       | 5.61 ± 0.15       | 5.92 ± 0.14          | 5.76 ± 0.13       | 0.08 (−0.29 to 0.46)           | 5.98 ± 0.12          | 5.52 ± 0.14      | −0.18 (−0.55 to 0.20)          |
| Urine osmolality (mosmol/kg)                       | 170 (121–241)     | 138 (114–182)     | 164 (134–225)        | 143 (114–259)     | 1.13 (0.87–1.45)§              | 154 (117–221)        | 139 (91–153)     | 0.81 (0.63–1.05)§              |
| Urinary flow (mL/min/1.73 m <sup>2</sup> )         | 5.6 ± 0.3         | 5.6 ± 0.3         | 5.4 ± 0.3            | 5.4 ± 0.4         | −0.0 (−1.0 to 0.9)             | 5.0 ± 0.3            | 5.4 ± 0.4        | 0.2 (−0.7 to 1.1)              |
| Osmolar clearance (mL/min/1.73 m <sup>2</sup> )    | 2.2 (2.0–2.6)     | 2.5 (2.1–2.8)     | 2.6 (2.2–2.8)        | 2.6 (2.1–3.0)     | 1.02 (0.83–1.26)§              | 2.5 (1.8–2.9)        | 2.3 (1.7–2.9)    | 0.88 (0.72–1.09)§              |
| Free water clearance (mL/min/1.73 m <sup>2</sup> ) | 1.9 ± 0.4         | 2.4 ± 0.3         | 1.4 ± 0.6            | 2.2 ± 0.4         | −0.4 (−1.4 to 0.7)             | 1.2 ± 0.9            | 2.7 ± 0.4        | −0.0 (−1.0 to 1.0)             |
| Renal damage                                       |                   |                   |                      |                   |                                |                      |                  |                                |
| ACR (mg/mmol)                                      | 1.13 (0.45–4.89)  | 2.12 (0.38–8.39)  | 1.10 (0.48–4.10)     | 0.89 (0.57–2.48)  | 0.68 (0.31–1.46)§              | 1.00 (0.52–1.33)     | 0.90 (0.46–1.24) | 0.76 (0.35–1.64)§              |
| NGAL (ng/mmol)                                     | 1,460 (773–2,363) | 1,368 (686–2,095) | 788 (620–2,072)      | 1,076 (835–2,555) | 0.87 (0.51–1.51)§              | 1,400 (836–2,580)    | 919 (746–2,627)  | 0.94 (0.53–1.66)§              |
| KIM-1 (ng/mmol)                                    | 84 (50–117)       | 62 (38–168)       | 113 (77–189)         | 110 (76–174)      | 1.31 (0.80–2.14)§              | 66 (47–128)          | 69 (62–214)      | 1.35 (0.83–2.19)§              |
| Systemic hemodynamics                              |                   |                   |                      |                   |                                |                      |                  |                                |
| SBP (mmHg)                                         | 145 ± 4           | 151 ± 4           | 140 ± 3              | 138 ± 3           | −9 (−17 to −1)*                | 134 ± 4              | 136 ± 4          | −8 (−17 to 0.03)               |
| DBP (mmHg)                                         | 78 ± 2            | 80 ± 2            | 81 ± 2               | 81 ± 1            | −1 (−5 to 3)                   | 78 ± 2               | 80 ± 2           | 0 (−4 to 4)                    |
| MAP (mmHg)                                         | 102 ± 2           | 105 ± 2           | 103 ± 2              | 102 ± 2           | −3 (−8 to 2)                   | 98 ± 2               | 101 ± 2          | −2 (−7 to 4)                   |
| Heart rate (bpm)                                   | 65 ± 2            | 65 ± 3            | 62 ± 2               | 62 ± 2            | 0 (−5 to 4)                    | 66 ± 2               | 71 ± 2           | 5 (0.4–9)*                     |

Data are mean ± SEM, median (interquartile range), or placebo and baseline-corrected mean difference (95% CI). RVR, renal vascular resistance. \*P < 0.05; §placebo and baseline-corrected ratio (95% CI).

Data are mean ± SEM, median (interquartile range), or placebo and baseline-corrected mean difference (95% CI). RVR, renal vascular resistance. \*P &lt; 0.05; §Placebo and baseline-corrected ratio (95% CI).



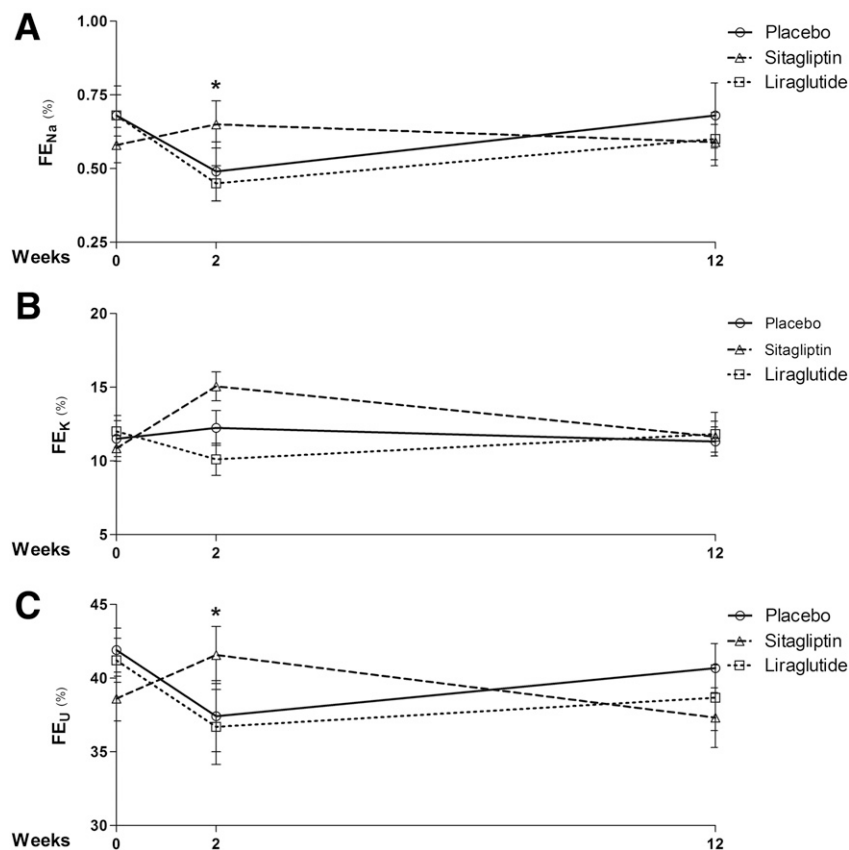

**Figure 2**—Mean  $\pm$  SEM creatinine-based fractional electrolyte excretions at weeks 0, 2, and 12. A: Sodium. B: Potassium. C: Urea. \* $P < 0.05$  vs. placebo at the given time point.

sodium hyper-reabsorption by reducing the activity of the sodium-hydrogen exchanger-3 (NHE3), which is coupled to a complex that also contains DPP-4, in the proximal tubule (1,4). By the increase in NaCl delivery to the macula densa, the subsequently activated TGF induces vasoconstriction of  $R_A$ , thereby potentially reducing  $P_{GLO}$  and (single-nephron) GFR (1,4). Numerous acute intervention studies have shown that GLP-1 and GLP1-RA increase proximal sodium excretion (17,21–24), and it was recently found that natriuresis was elevated after 3 weeks of liraglutide treatment (33). Intriguingly, in the current study, neither drug affected sodium excretion or diuresis after 12 weeks of treatment, although  $FE_{Na}$  transiently increased after 2 weeks of sitagliptin treatment. Possibly, GLP-1-based therapy–associated inhibition of NHE3 induces an initial period of negative sodium balance and fall in extracellular volume, which, as with classical diuretics, is subsequently counterbalanced by other factors, such as neurohumoral- and flow-mediated increases in tubular reabsorption (34). This

may, among others (35,36), explain the blood pressure–lowering effects of these drugs, which in itself are unlikely to have affected renal hemodynamics in the current study as autoregulatory functions are apparently intact in patients without CKD. However, in conflict with this chain of events, recent studies using validated antibodies could not demonstrate the GLP-1 receptor in the proximal tubule (37), while only a minor portion of liraglutide-related metabolites passes the glomerular membrane (23), indicating that direct effects on renal NHE3 are unlikely. Potentially, transient natriuretic effects of GLP-1–based therapies are related to initial (modest) blood pressure increases (21,24), i.e., pressure natriuresis, or reductions in angiotensin-II (23,32). Reductions in renin release could also lead to reductions in GFR and  $P_{GLO}$  by reducing angiotensin-II–mediated vasoconstriction of the  $R_E$ . However, we did not observe changes in PRC. Interestingly, although  $R_A$  or  $R_E$  were not affected,  $P_{GLO}$  was somewhat reduced with sitagliptin, which may point toward a renoprotective hemodynamic effect, but might also be the result of

concurrent small reductions in GFR and albumin used in the Gomez formula to calculate this parameter. Notably, a decrease in plasma protein concentration decreases the ultrafiltration coefficient in order to maintain stable GFR (38), but the Gomez estimation does not include this adaptation. Finally, obesity per se has also been associated with glomerular hyperfiltration (1). We observed reductions in body weight without effects on body water percentage in the liraglutide group, which may imply the absence of successive decreases in absolute body water, cardiac output, ERPF, and GFR.

Long-term studies in type 2 diabetes indicate that GLP-1–based therapies decrease albuminuria, at least partly independent of their glucose-lowering effects (5,7–14,18). Furthermore, it has been suggested that the liraglutide-induced benefits on renal outcome in the recent Liraglutide Effect and Action in Diabetes: Evaluation of Cardiovascular Outcome Results (LEADER) trial could be due to improvements in renal risk factors, including renal hemodynamics (15). Indeed, we observed favorable effects on glycemia and several other renal risk factors, such as blood pressure and body weight, whereas glomerular filtration and dyslipidemia were seemingly unaffected. However, ACR and other markers of renal damage did not improve, which could be due to the relative short duration of follow-up and/or the low level of renal damage in the current population at baseline.

Based on our and previous studies, one could speculate that the effects of GLP-1–based therapies on renal hemodynamics depend on treatment duration, hyperfiltration status (at the whole-kidney or single-nephron level), and other population-specific differences. First, potential acute effects could have returned toward baseline after long-term treatment due to receptor tachyphylaxis or compensatory mechanisms. Interestingly, a transient reduction in eGFR after 2 weeks was observed in our study. However, as this small initial fall in eGFR also occurred in the placebo group, the clinical significance of this observation is uncertain. Second, GLP-1–based therapies may reduce GFR in the setting of glomerular hyperfiltration at the whole-kidney level (defined as  $GFR > 125$ – $140$  mL/min/1.73 m<sup>2</sup>) (1,17). Moreover,

one could speculate that GLP-1–based therapies also reduce GFR in patients with microalbuminuria or renal impairment, who are more likely to exhibit compensatory hyperfiltration at the single-nephron level due to reduced nephron numbers (1,13,18). Although the mean FF of 23.7% in the current study is indicative of the presence of glomerular hyperfiltration, as it is well above the 17.7% normally found in healthy young adults (39), whole-kidney GFR was (only) mildly decreased ( $<90$  mL/min/1.73 m<sup>2</sup>) and ACR was not increased. Possibly, GLP-1–based therapies do not uniformly affect GFR in a population with type 2 diabetes with varying disease duration and potentially a more heterogeneous phenotype, as was the fact in the current trial. Finally, GLP-1–based therapies may not have relevant TGF-mediated effects in patients with type 2 diabetes, or their effect on (intra)renal hemodynamics is blunted by concomitant effects of the extensive use of RAS inhibitors in the current trial, which are known to reduce  $P_{GLO}$  and (single-nephron) hyperfiltration by reducing  $R_E$  (1,4). Notably, the relatively low PRC corresponds with other populations with diabetes and also does not indicate excessive RAS blockade (40).

This study has several limitations that need to be mentioned. First, confounding effects of glucose lowering or hormonal differences (e.g., insulin and glucagon) cannot be excluded since we did not perform clamp techniques during the renal tests. However, the current trial aimed to assess real-life effects. Second, formulas to estimate intrarenal hemodynamic variables necessitate assumptions. Third, although the current study was adequately powered to assess our hypothesis, there was not sufficient power to assess the effects in subpopulations, including patients with higher GFR, FF, or albuminuria at baseline. Fourth, the follow-up was relatively short, which may impede generalization to longer treatment periods. Nevertheless, we feel that the current study was sufficient to address all of the most likely mechanisms by which GLP-1–based therapies may affect renal hemodynamics, and, therefore, we speculate that longer treatment would not substantially change our findings.

In conclusion, 12-week treatment with sitagliptin or liraglutide has no

effect on gold standard–measured renal hemodynamics in overweight patients with type 2 diabetes without CKD. However, sitagliptin modestly decreased estimated  $P_{GLO}$ , of which the validity and clinical relevance remains speculative. Furthermore, sitagliptin increased sodium excretion, although this did not sustain after 12 weeks. Our results indicate that the potential glucose-independent renoprotective effects of GLP-1–based therapy may not be explained by (intra)renal hemodynamic improvements but likely relate to benefits on other renal risk factors, such as blood pressure and body weight. Clinical trials with predefined (hard) renal end points are needed to determine whether GLP-1–based therapies confer renoprotection in patients with type 2 diabetes, and the use of active comparators in such studies (NCT01243424) may establish effects beyond glucose lowering.

**Acknowledgments.** The authors thank J. Boerop and S. Gassman (Diabetes Center, Department of Internal Medicine, VU University Medical Center) for their excellent practical support during the test visits. The authors also much appreciated the technical laboratory assistance of A. Dijk and N. Willekes-Koolschijn (Department of Nephrology and Hypertension, University Medical Center).

**Funding.** The research leading to these results received funding from the European Community's Seventh Framework Programme (FP7/2007-2013) (under grant agreement 282521, the SAFEGUARD project) and the Dutch Kidney Foundation (under grant agreement IP12.87). Novo Nordisk provided liraglutide and liraglutide-placebo pens.

The funders had no role in the study design; collection, analysis, and interpretation of data; writing of the manuscript; or decision to submit the manuscript for publication.

**Duality of Interest.** Through M.H.H.K. and M.D., the VU University Medical Center received research grants from AstraZeneca, Boehringer Ingelheim, Novo Nordisk, and Sanofi. No other potential conflicts of interest relevant to this article were reported.

**Author Contributions.** L.T. performed the measurements, analyzed and interpreted the data, and drafted and completed the final manuscript. M.M.S. designed the study, performed measurements, was involved in statistical analyses, and contributed to the critical revision of the manuscript. M.H.A.M. was involved in statistical analyses and interpretation of the data and contributed to the critical revision of the manuscript. T.H. was involved in the statistical analyses and contributed to the critical revision of the manuscript. M.H.H.K., A.H.J.D., P.M.t.W., J.A.J., and D.H.v.R. contributed to the interpretation

of the data, discussion of the intellectual content, and critical editing of the manuscript. M.D. designed the study and was initially involved in the discussion and supervision. L.T. is the guarantor of this work and, as such, had full access to all the data in the study and takes responsibility for the integrity of the data and the accuracy of the data analysis.

**Prior Presentation.** This study was presented at the 76th Scientific Sessions of the American Diabetes Association, New Orleans, LA, 10–14 June 2016.

## References

1. Muskiet MH, Tonneijck L, Smits MM, Kramer MH, Heerspink HJ, van Raalte DH. Pleiotropic effects of type 2 diabetes management strategies on renal risk factors. *Lancet Diabetes Endocrinol* 2015;3:367–381
2. Gaede P, Lund-Andersen H, Parving HH, Pedersen O. Effect of a multifactorial intervention on mortality in type 2 diabetes. *N Engl J Med* 2008;358:580–591
3. Vazquez-Benitez G, Desai JR, Xu S, et al. Preventable major cardiovascular events associated with uncontrolled glucose, blood pressure, and lipids and active smoking in adults with diabetes with and without cardiovascular disease: a contemporary analysis. *Diabetes Care* 2015;38:905–912
4. Muskiet MH, Smits MM, Morsink LM, Diamant M. The gut-renal axis: do incretin-based agents confer renoprotection in diabetes? *Nat Rev Nephrol* 2014;10:88–103
5. Cooper ME, Perkovic V, McGill JB, et al. Kidney disease end points in a pooled analysis of individual patient-level data from a large clinical trials program of the dipeptidyl peptidase 4 inhibitor linagliptin in type 2 diabetes. *Am J Kidney Dis* 2015;66:441–449
6. Goldshtein I, Karasik A, Melzer-Cohen C, et al. Urinary albumin excretion with sitagliptin compared to sulfonylurea as add on to metformin in type 2 diabetes patients with albuminuria: a real-world evidence study. *J Diabetes Complications* 2016;30:1354–1359
7. Hattori S. Sitagliptin reduces albuminuria in patients with type 2 diabetes. *Endocr J* 2011;58:69–73
8. Kawasaki I, Hiura Y, Tamai A, et al. Sitagliptin reduces the urine albumin-to-creatinine ratio in type 2 diabetes through decreasing both blood pressure and estimated glomerular filtration rate. *J Diabetes* 2015;7:41–46
9. Sakata K, Hayakawa M, Yano Y, et al. Efficacy of alogliptin, a dipeptidyl peptidase-4 inhibitor, on glucose parameters, the activity of the advanced glycation end product (AGE)–receptor for AGE (RAGE) axis and albuminuria in Japanese type 2 diabetes. *Diabetes Metab Res Rev* 2013;29:624–630
10. Bergenstal RM, Wysham C, Macconell L, et al.; DURATION-2 Study Group. Efficacy and safety of exenatide once weekly versus sitagliptin or pioglitazone as an adjunct to metformin for treatment of type 2 diabetes (DURATION-2): a randomised trial. *Lancet* 2010;376:431–439
11. Imamura S, Hirai K, Hirai A. The glucagon-like peptide-1 receptor agonist, liraglutide, attenuates the progression of overt diabetic nephropathy in type 2 diabetic patients. *Tohoku J Exp Med* 2013;231:57–61
12. Pfeffer MA, Claggett B, Diaz R, et al.; ELIXA Investigators. Lixisenatide in patients with
